# Supplementary material for: Local Li-ion conductivity changes within Al stabilized Li7La3Zr2O12 and their relationship to three-dimensional variations of the bulk composition
Source: Royal Society of Chemistry journal article supplement (doi:10.1039/c9ta00356h), 2019-01-01
Supplement: c9ta00356h1.pdf [file c9ta00356h1.pdf]

## SUPPORTING INFORMATION

for

### Local Li-ion conductivity changes within $\text{Li}_7\text{La}_3\text{Zr}_2\text{O}_{12}$ solid electrolytes and their relation to three dimensional variations of the bulk composition

Smetaczek Stefan<sup>1,\*</sup>, Wachter-Welzl Andreas<sup>1</sup>, Wagner Reinhard<sup>2</sup>, Rettenwander Daniel<sup>3,4</sup>, Amthauer Georg<sup>2</sup>, Andrejs Lukas<sup>5</sup>, Taibl Stefanie<sup>1</sup>, Limbeck Andreas<sup>1</sup>, Fleig Juergen<sup>1</sup>

<sup>1</sup>Institute of Chemical Technologies and Analytics, Technische Universität Wien, Austria

<sup>2</sup>Department of Chemistry and Physics of Materials, University of Salzburg, Austria

<sup>3</sup>Institute for Chemistry and Technology of Materials, Graz University of Technology, Austria

<sup>4</sup>Christian Doppler Laboratory for Lithium Batteries, Institute for Chemistry and Technology of Materials, Graz University of Technology, Graz, Austria

<sup>5</sup>Austrian Institute of Technology, Vienna, Austria

\*Corresponding author: [Stefan.Smetaczek@tuwien.ac.at](mailto:Stefan.Smetaczek@tuwien.ac.at)

#### CONTENT:

1. Parameters LA-ICP-OES measurement
2. LA-ICP-OES images:
  - 2a. Sample A: Li distribution in 50  $\mu\text{m}$  and 100 $\mu\text{m}$  depth
  - 2b. Sample B and C: Li distribution in 5  $\mu\text{m}$  depth
  - 2c. Sample D: Al and Li distribution in 5  $\mu\text{m}$  and 100  $\mu\text{m}$  depth

**Table S1 Parameters for the LA-ICP-OES measurement**

|                           |                         |            |
|---------------------------|-------------------------|------------|
| Laser ablation system     | ESI NWR213              |            |
| Average fluence           |                         |            |
| Pre-Ablation              | 2.50 J cm <sup>-2</sup> |            |
| Imaging                   | 4.25 J cm <sup>-2</sup> |            |
| Laser diameter            |                         |            |
| Pre-Ablation              | 250 μm                  |            |
| Imaging                   | 100 μm                  |            |
| Scan speed                |                         |            |
| Pre-Ablation              | 250 μm s <sup>-1</sup>  |            |
| Imaging                   | 100 μm s <sup>-1</sup>  |            |
| Repetition rate           | 20 Hz                   |            |
| Carrier gas flow (He)     | 0.6 l min <sup>-1</sup> |            |
| Make-up gas flow (Ar)     | 0.8 l min <sup>-1</sup> |            |
| ICP-OES instrumentation   | Thermo iCAP 6500 RAD    |            |
| RF power                  | 1200 W                  |            |
| Radial observation height | 12 mm                   |            |
| Plasma gas flow           | 12 l min <sup>-1</sup>  |            |
| Auxiliary gas flow        | 0.5 l min <sup>-1</sup> |            |
| Integration time          | 1 s                     |            |
| Analytical wavelengths    |                         |            |
| Al                        | 309.271 nm              | 396.152 nm |
| La                        | 261.034 nm              | 419.655 nm |
| Li                        | 610.362 nm              | 670.784 nm |
| Zr                        | 257.139 nm              | 274.256 nm |

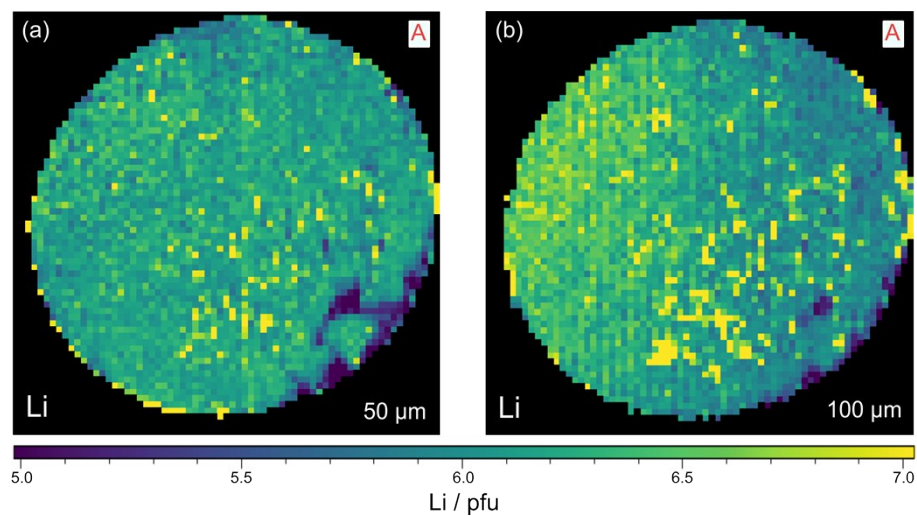**Fig. S1** LA-ICP-OES distribution images of sample A, illustrating the amount of lithium in (a) 50 μm and (b) 100 μm sample depth.

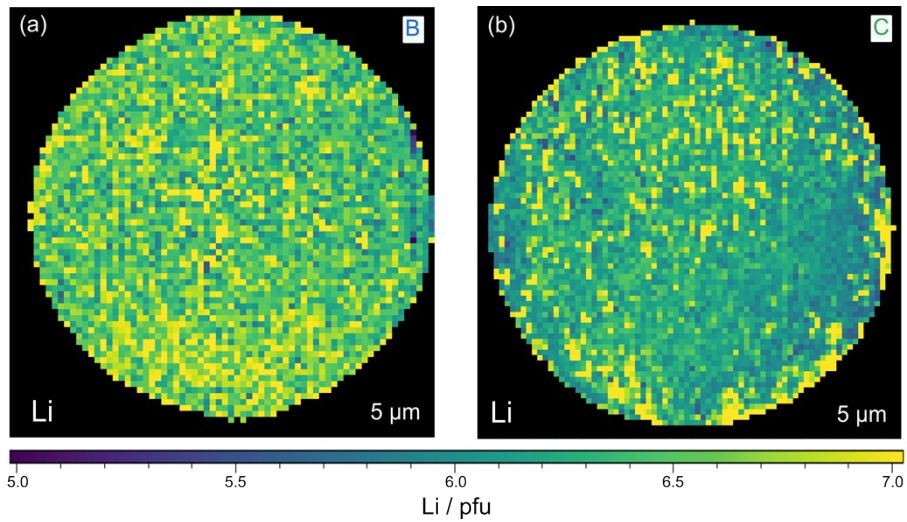

Fig. S2 LA-ICP-OES images of (a) sample B and (b) sample C, illustrating the amount of Li in 5 μm depth.

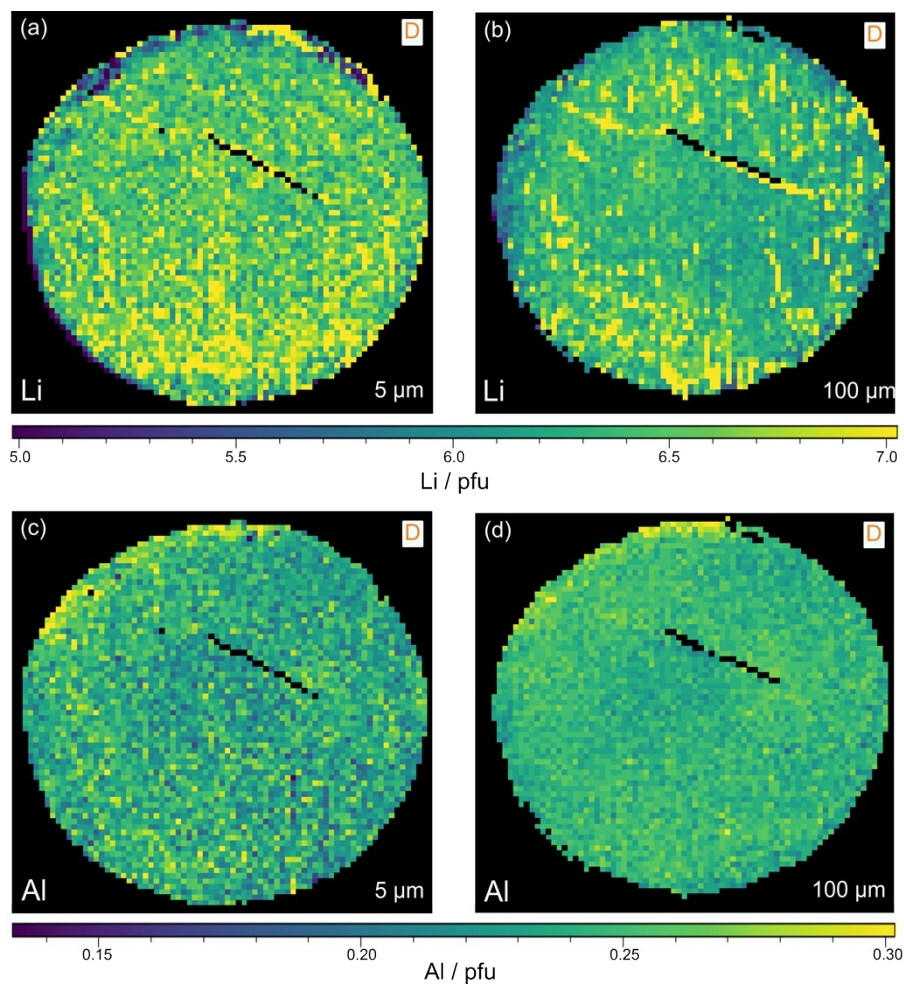

Fig. S3 LA-ICP-OES images of sample D, illustrating the amount of Li (a,c) and Al (b,d) in 5 μm and 100 μm depth.
